# Supplementary material for: Quality Indicators and Clinical Outcomes of Acute Stroke: Results from a Prospective Multicenter Registry in Greece (SUN4P)
Source: MDPI journal article supplement (doi:10.3390/jcm13030917), 2024-02-05
Supplement: s1 [file s1]

## Supplementary material

### Supplementary Table S1

### Supplementary Figure S1

### Supplementary Figure S2

**Table S1.** Comparison of baseline characteristics, stroke severity and mortality during Covid pandemic and outside Covid era.

|                      | Pre-Covid<br>N=279 | Covid period<br>N=613 | <i>p</i> = |
|----------------------|--------------------|-----------------------|------------|
| Mean age             | 74.4 (SD 14.0)     | 76.1 (13.3)           | 0.073      |
| NIHSS                | 8.5 (SD 7.6)       | 9.4 (SD 8.2)          | 0.096      |
| Male gender          | 51.6%              | 49.4%                 | 0.564      |
| Ischemic stroke      | 83.5%              | 85.2%                 | 0.548      |
| Inhospital Mortality | 10.0%              | 13.5%                 | 0.156      |

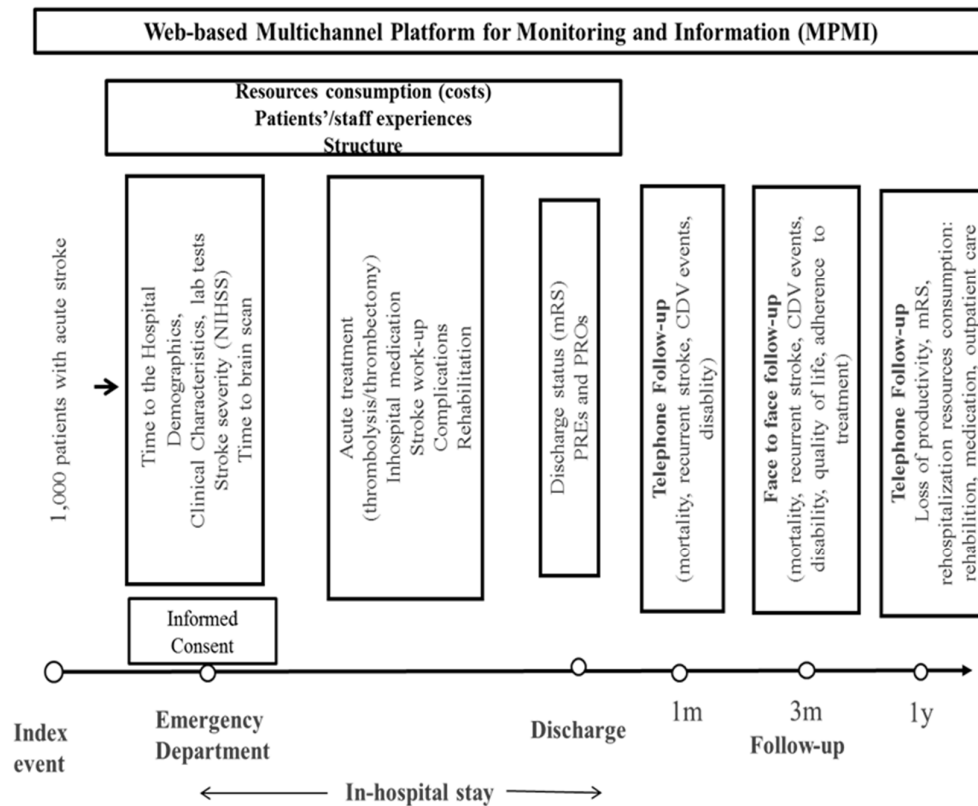

**Figure S1.** Study design.

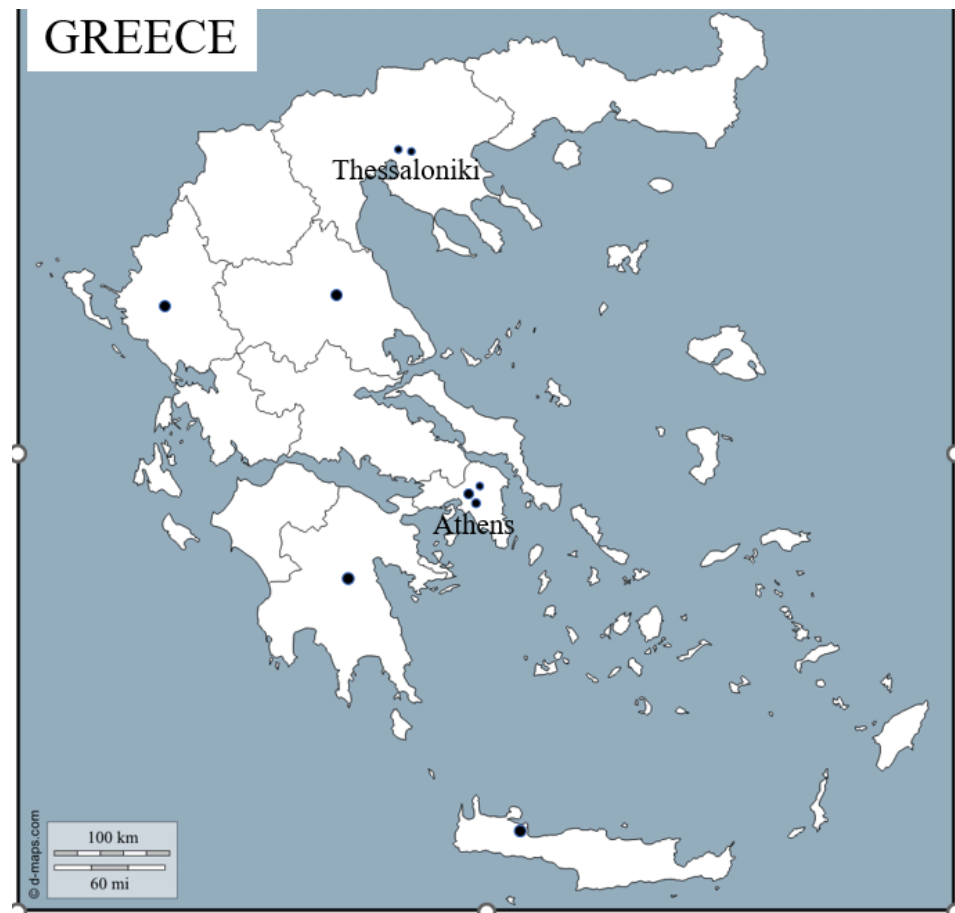

Figure S2. Sites of participated study centers.
